# Supplementary material
Source: MDPI journal article supplement (https://www.mdpi.com/1660-4601/12/6/6506)
Supplement: s1 [file s1]

## Environmental Asthma Reduction Potential Estimates for Selected Mitigation Actions in Finland Using a Life Table Approach

**Table S1.** Summary of the epidemiological studies on primary exposures selected as asthma mitigation targets.

| Stressor                                | Association | Response           | Definition of Asthma                          | Age (Years) | Exposure Unit         | ERF Parameter | ERF (CI)            | Country   | Study Design and Size                        | Author, year                        |
|-----------------------------------------|-------------|--------------------|-----------------------------------------------|-------------|-----------------------|---------------|---------------------|-----------|----------------------------------------------|-------------------------------------|
| Second Hand Tobacco Smoke               | Risk        | Onset              | self-reported and physician diagnosed         | <14         | yes/no                | OR            | 1.32<br>(1.24–1.41) | worldwide | Meta-Analysis of 29 studies                  | Cal-EPA, 2005                       |
| Second Hand Tobacco Smoke               | Risk        | Onset              | physician diagnosed and/or KELA reimbursement | ≥21         | yes/no                | RR            | 1.97<br>(1.19–3.25) | Finland   | Case-Control study (521 cases, 932 controls) | Jaakkola <i>et al.</i> , 2003       |
| Active Smoking                          | Risk        | Exacerbation       | self-reported asthma                          | 13–14       | yes/no                | OR            | 1.2<br>(0.7–2.1)    | France    | Cohort study (15171 subjects)                | Annesi-Maesano <i>et al.</i> , 2004 |
| Active Smoking                          | Risk        | Exacerbation       | self-reported asthma                          | ≥20         | yes/no                | OR            | 1.03<br>(1.03–1.04) | Norway    | Cohort study (65717 subjects)                | Langhammer <i>et al.</i> , 2000     |
| Particulate Matter (PM <sub>2.5</sub> ) | Risk        | Onset and wheezing | physician-diagnosed                           | all ages    | 10 µg m <sup>-3</sup> | RR            | 1.16<br>(0.98–1.37) | worldwide | Meta-Analysis of 5 studies                   | Anderson <i>et al.</i> , 2013       |
| Dampness and Mould                      | Risk        | Onset              | physician diagnosed and first-time diagnosis  | all ages    | yes/no                | OR            | 1.34<br>(0.86–2.10) | worldwide | Meta-Analysis of 4 studies                   | Fisk, Lei-Gomez and Mendell, 2007   |

|     |            |       |                          |      |        |    |                     |         |                                                         |                           |
|-----|------------|-------|--------------------------|------|--------|----|---------------------|---------|---------------------------------------------------------|---------------------------|
| Cat | Protection | Onset | self-reported by parents | 7–16 | yes/no | OR | 0.47<br>(0.14–1.58) | Finland | population-based cross sectional study (1,400 subjects) | Hugg <i>et al.</i> , 2008 |
|-----|------------|-------|--------------------------|------|--------|----|---------------------|---------|---------------------------------------------------------|---------------------------|

Table S1. Cont.

| Stressor    | Association | Response     | Definition of Asthma     | Age (Years) | Exposure Unit | ERF Parameter | ERF (CI)            | Country | Study Design and Size                                   | Author, year                |
|-------------|-------------|--------------|--------------------------|-------------|---------------|---------------|---------------------|---------|---------------------------------------------------------|-----------------------------|
| Dog         | Protection  | Onset        | self-reported by parents | 7–16        | yes/no        | OR            | 0.37<br>(0.13–1.1)  | Finland | population-based cross sectional study (1 400 subjects) | Hugg <i>et al.</i> , 2008   |
| Cat Allergy | Risk        | Exacerbation | self-reported symptoms   | 7–8         | yes/no        | OR            | 1.67<br>(0.83–3.37) | USA     | Case-Control study (128 cases, 111 controls)            | Olmedo <i>et al.</i> , 2011 |
| Dog Allergy | Risk        | Exacerbation | self-reported symptoms   | 7–8         | yes/no        | OR            | 2.78<br>(1.29–5.99) | USA     | Case-Control study (128 cases, 111 controls)            | Olmedo <i>et al.</i> , 2011 |
